# Supplementary material for: Environmental controls on the elemental composition of a Southern Hemisphere strain of the coccolithophore Emiliania huxleyi
Source: Copernicus journal article supplement (doi:10.5194/bg-15-581-2018), 2018-01-30
Supplement: Supplementary file 1 [file bg-15-581-2018-supplement.pdf]

Supplement of Biogeosciences, 15, 581–595, 2018  
<https://doi.org/10.5194/bg-15-581-2018-supplement>  
© Author(s) 2018. This work is distributed under  
the Creative Commons Attribution 4.0 License.

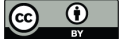

*Supplement of*

## **Environmental controls on the elemental composition of a Southern Hemisphere strain of the coccolithophore *Emiliana huxleyi***

**Yuanyuan Feng et al.**

*Correspondence to:* Yuanyuan Feng (yfeng@tust.edu.cn)

The copyright of individual parts of the supplement might differ from the CC BY 4.0 License.

**Table S1. The fitted parameters and the goodness of fit (Burham and Anderson 1998) from the equation fittings of *Emiliania huxleyi* elemental composition vs. different environmental drivers.**

| Physiological metrics | Driver           | Equation                                                             | Fitted parameters                                      | Goodness of fit*                            |
|-----------------------|------------------|----------------------------------------------------------------------|--------------------------------------------------------|---------------------------------------------|
| Cellular POC          | Irradiance       | $f(S) = Q_{max} \frac{S}{S + k + \frac{S^2}{k_{inh}}}$               | $Q_{max} = 18.07$<br>$k = 18.67$<br>$K_{inh} = 1562$   | $R^2 = 0.69$<br>DF = 12                     |
|                       | Temperature      | $f(T) = (Q_0 - Q_c)e^{-kT} + Q_c$                                    | $Q_0 = 51.76$<br>$Q_c = 7.21$<br>$k = 0.18$            | $R^2 = 0.90$<br>DF = 15                     |
|                       | pCO <sub>2</sub> | $f(S) = Q_{max} \frac{S}{S + K_m}$                                   | $Q_{max} = 16.36$<br>$K_m = 44.86$                     | $R^2 = 0.36$<br>DF = 15                     |
| Cellular PIC          | Temperature      | $f(T) = (Q_0 - Q_c)e^{-kT} + Q_c$                                    | $Q_0 = 206.9$<br>$Q_c = 6.94$<br>$k = 0.29$            | $R^2 = 0.85$<br>DF = 9                      |
| PIC:POC               | Irradiance       | $f(S) = \frac{S + k + \frac{S^2}{k_{inh}}}{SR_{max}}$                | $R_{max} = 1.49$<br>$k = 11.15$<br>$K_{inh} = 1753$    | $R^2 = 0.74$<br>DF = 13                     |
|                       | Temperature      | $f(T) = ae^{bT} \left[ 1 - \left( \frac{T-z}{w/2} \right)^2 \right]$ | $a = 1.05$<br>$b \sim 0$<br>$z = 17.24$<br>$w = 38.95$ | $R^2 = 0.38$<br>DF = 14                     |
|                       | pCO <sub>2</sub> | $f(S) = (R_0 - R_c)e^{-kS} + R_c$                                    | $R_0 = 2.07$<br>$R_c = 0.82$<br>$k = 0.01$             | $R^2 = 0.74$<br>DF = 12                     |
| Cellular PON          | Nitrate          | $f(S) = Q_{max} \frac{S}{S + K_m}$                                   | $Q_{max} = 2.23$<br>$K_m = 6.13$                       | $R^2 = 0.76$<br>DF = 14                     |
|                       | Temperature      | $f(T) = (Q_0 - Q_c)e^{-kT} + Q_c$                                    | $Q_0 = 5.79$<br>$Q_c = 1.07$<br>$k = 0.11$             | $R^2 = 0.93$<br>DF = 13                     |
| Cellular POP          | Nitrate          | $f(S) = Q_{max} \frac{S}{S + K_m}$                                   | $Q_{max} = 0.31$<br>$K_m = 2.46$                       | $R^2 = 0.64$<br>DF = 16                     |
|                       | Phosphate        | $f(S) = Q_{max} \frac{S}{S + K_m}$                                   | $Q_{max} = 0.36$<br>$K_m = 2.44$                       | $R^2 = 0.96$<br>DF = 12                     |
|                       | Temperature      | $f(T) = (Q_0 - Q_c)e^{-kT} + Q_c$                                    | $Q_0 = 2.29$<br>$Q_c = 0.20$<br>$k = 0.22$             | $R^2 = 0.96$<br>DF = 15                     |
|                       | pCO <sub>2</sub> | $f(S) = Q_{max} \frac{S}{S + K_m}$                                   | $Q_{max} = 0.37$ ;<br>$K_m = 82.40$                    | $R^2 = 0.65$<br>DF = 16                     |
| C:Chl- <i>a</i>       | Nitrate          | $f(S) = (R_0 - R_c)e^{-kT} + R_c$                                    | $R_0 = 1312$<br>$R_c = 57.47$<br>$k = 0.34$            | $R^2 = 0.95$<br>DF = 13                     |
|                       | Phosphate        | $f(R) = b - aR$                                                      | $a = 0.74$ ;<br>$b = 74.18$                            | $R^2 = 0.54$<br>F (1,11)=13.10;<br>p<0.05   |
|                       | Irradiance       | $f(R) = b - aR$                                                      | $a = -0.10$ ;<br>$b = 49.22$                           | $R^2 = 0.89$<br>F (1,14)=108.1;<br>p<0.0001 |

| Physiological metrics | Driver         | Equation                           | Fitted parameters                          | Goodness of fit*        |
|-----------------------|----------------|------------------------------------|--------------------------------------------|-------------------------|
|                       | Temperature    | $f(T) = (R_0 - R_c)e^{-kT} + R_c$  | $R_0 = 534$<br>$R_c = 51.89$<br>$k = 0.45$ | $R^2 = 0.77$<br>DF = 15 |
|                       | $p\text{CO}_2$ | $f(S) = R_{max} \frac{S}{S + K_m}$ | $R_{max} = 78.61$ ;<br>$K_m = 50.21$       | $R^2 = 0.48$<br>DF = 15 |

\*Parameters representing the goodness of fit include  $R^2$  (the correlation coefficient) and DF (degree of freedom) for the non-linear regressions; and  $R^2$ , F value, and p value (F and p values test whether the slope is significantly different from zero, with a significant level when  $p < 0.05$ ) for the linear regression.

5

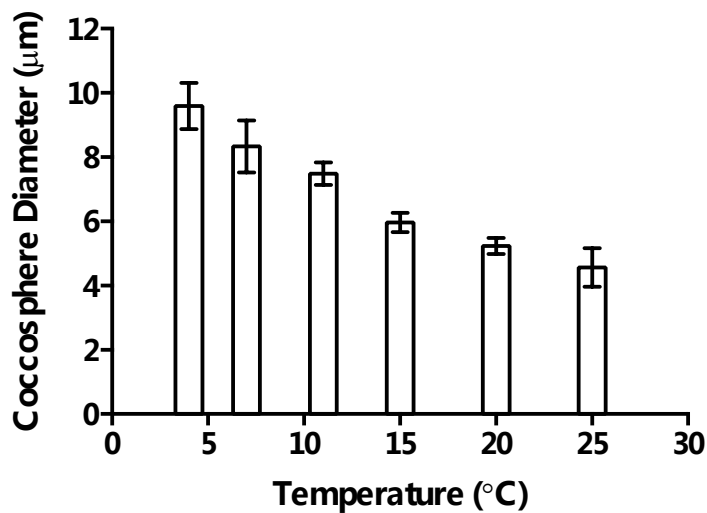

10 **Figure S1. The coccusphere diameter at the six temperature treatments from the temperature manipulation experiment (>30 cells measured for each treatment).**
